# Supplementary material
Source: Research Square preprint supplement (doi:10.21203/rs.3.rs-8918891/v1)
Supplement: Supplementary file 2 [file 3beda0af1317f7f0eb58ea3a.pdf]

# Genomes

TE families

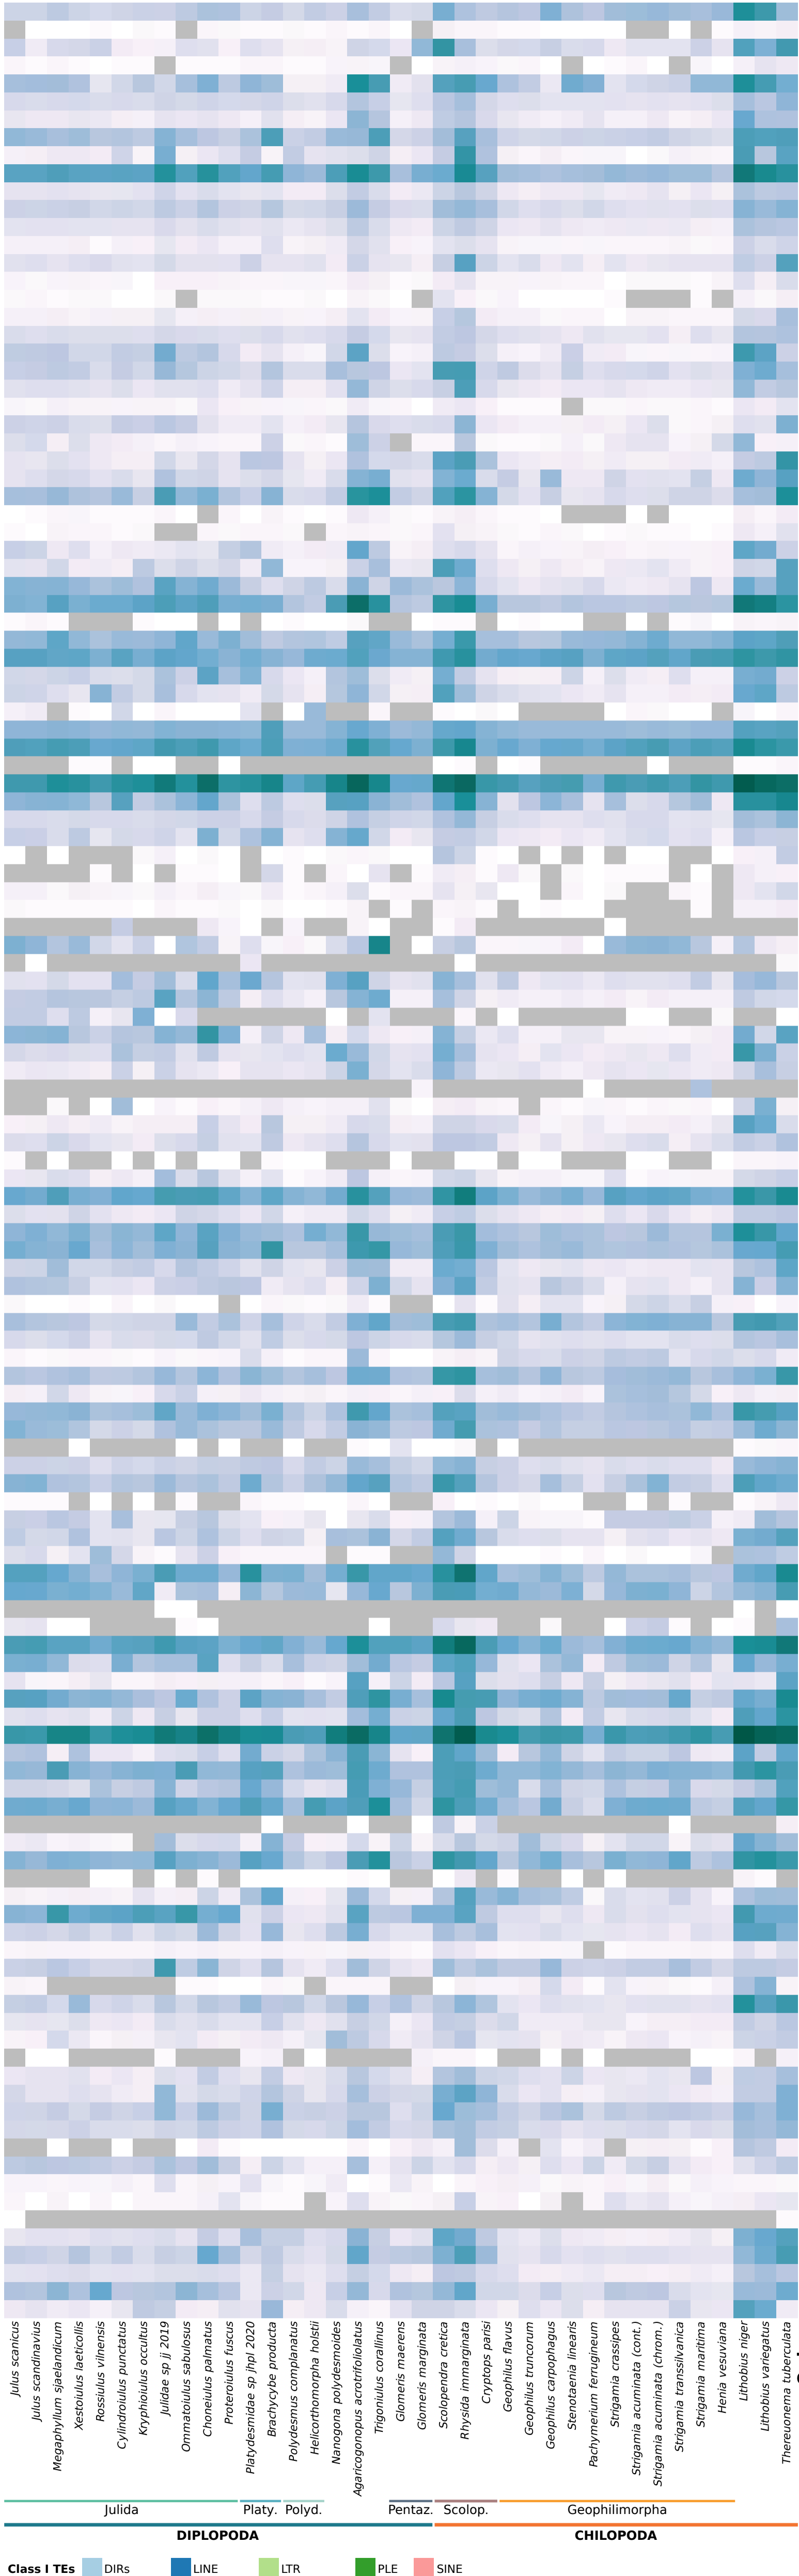

- DIRS
- DIRS - Q
- Ngaro
- Viper - TATE
- I
- I - Ingi
- I - Nimb
- I - R1
- Jockey
- Jockey - CR1
- Jockey - Crack
- Jockey - Daphne
- Jockey - L2
- Jockey - L2B
- Jockey - Loa
- Jockey - Outcast
- Jockey - Rex1
- Jockey - Vingi
- L1 - DRE
- L1 - L1
- L1 - Tx1
- R2 - CRE
- R2 - Hero
- R2 - NeSL
- R2 - R2
- R2 - R4
- RTE
- RTE - BovB
- RTE - ORTE
- RTE - Proto-1
- RTE - Proto-2
- RTE - RTE
- RTE - RTE-X
- Unknown LINE
- Unknown LINE - Genie
- Bel-Pao
- Copia - Ty1-Copia
- ERV - ERV1
- ERV - ERV2
- ERV - ERV3
- Gypsy - Caulimoviridae
- Gypsy - Gypsy
- Gypsy - Micropia
- Unknown LTR
- Penelope
- Penelope - Athena
- Penelope - Chlamys
- Penelope - Naiad
- Penelope - Nematis
- Penelope - Neptune
- Penelope - Poseidon
- 5S
- 5S - Deu-core
- 7SL - No-core
- Unknown SINE
- snRNA - No\_or\_Unknown\_Core
- tRNA - Deu-core
- tRNA - MIR-core
- tRNA - No-core
- tRNA - No\_or\_Unknown\_Core
- tRNA - V-core
- tRNA and 7SL - No-core
- Crypton - Crypton-A
- Crypton - Crypton-H
- Crypton - Crypton-I
- Crypton - Crypton-V
- Helitron - Helitron-1
- Helitron - Helitron-2
- Maverick
- CACTA - CMC
- CACTA - Transib
- Merlin
- Mutator
- Mutator - MULE-MuDR
- Mutator - MuDR
- Mutator - NOF
- P
- P - Fungi-specific\_Branch
- PIF-Harbinger - Harbinger
- PIF-Harbinger - ISL2EU
- PIF-Harbinger - Spy
- PiggyBac - Looper
- PiggyBac - PiggyBac
- PiggyBac - PiggyBac-A
- Tc1-Mariner
- Tc1-Mariner - Fot1
- Tc1-Mariner - ISRM11
- Tc1-Mariner - Mariner
- Tc1-Mariner - Pogo
- Tc1-Mariner - Sagan
- Tc1-Mariner - Stowaway
- Tc1-Mariner - Tc1
- Tc1-Mariner - Tc2
- Tc1-Mariner - Tc4
- Tc1-Mariner - Tigger
- Tc1-Mariner - m44
- Unknown TIR
- hAT
- hAT - Activator
- hAT - Blackjack
- hAT - Charlie
- hAT - Pegasus
- hAT - Tag1
- hAT - Tip100
- hAT - hAT1
- hAT - hAT19
- hAT - hAT5
- hAT - hATm
- hAT - hATw
- hAT - hATx
- hAT - hobo
- Academ - Academ-1
- Academ - Academ-H
- Dada
- Ginger
- Ginger - Ginger-1
- Ginger - Ginger-2
- IS3EU
- Kolobok
- Kolobok - Hydra-specific\_Branch
- Kolobok - Kolobok-E
- Kolobok - Kolobok-H
- Kolobok - T2
- MITE
- Sola - Sola-1
- Sola - Sola-2
- Sola - Sola-3
- Zator
- Zisupton

Load (log)

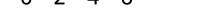

**DIPLOPODA**      **CHILOPODA**  
 Julida      Platy.      Polyd.      Pentaz.      Scolop.      Geophilomorpha

**Class I TEs**      DIRs      LINE      LTR      PLE      SINE  
**Class II TEs**      Crypton      Helitron      Maverick      TIR      Other Class II
