# Supplementary material
Source: Research Square preprint supplement (doi:10.21203/rs.3.rs-8918891/v1)

# Genomes

TE superfamilies

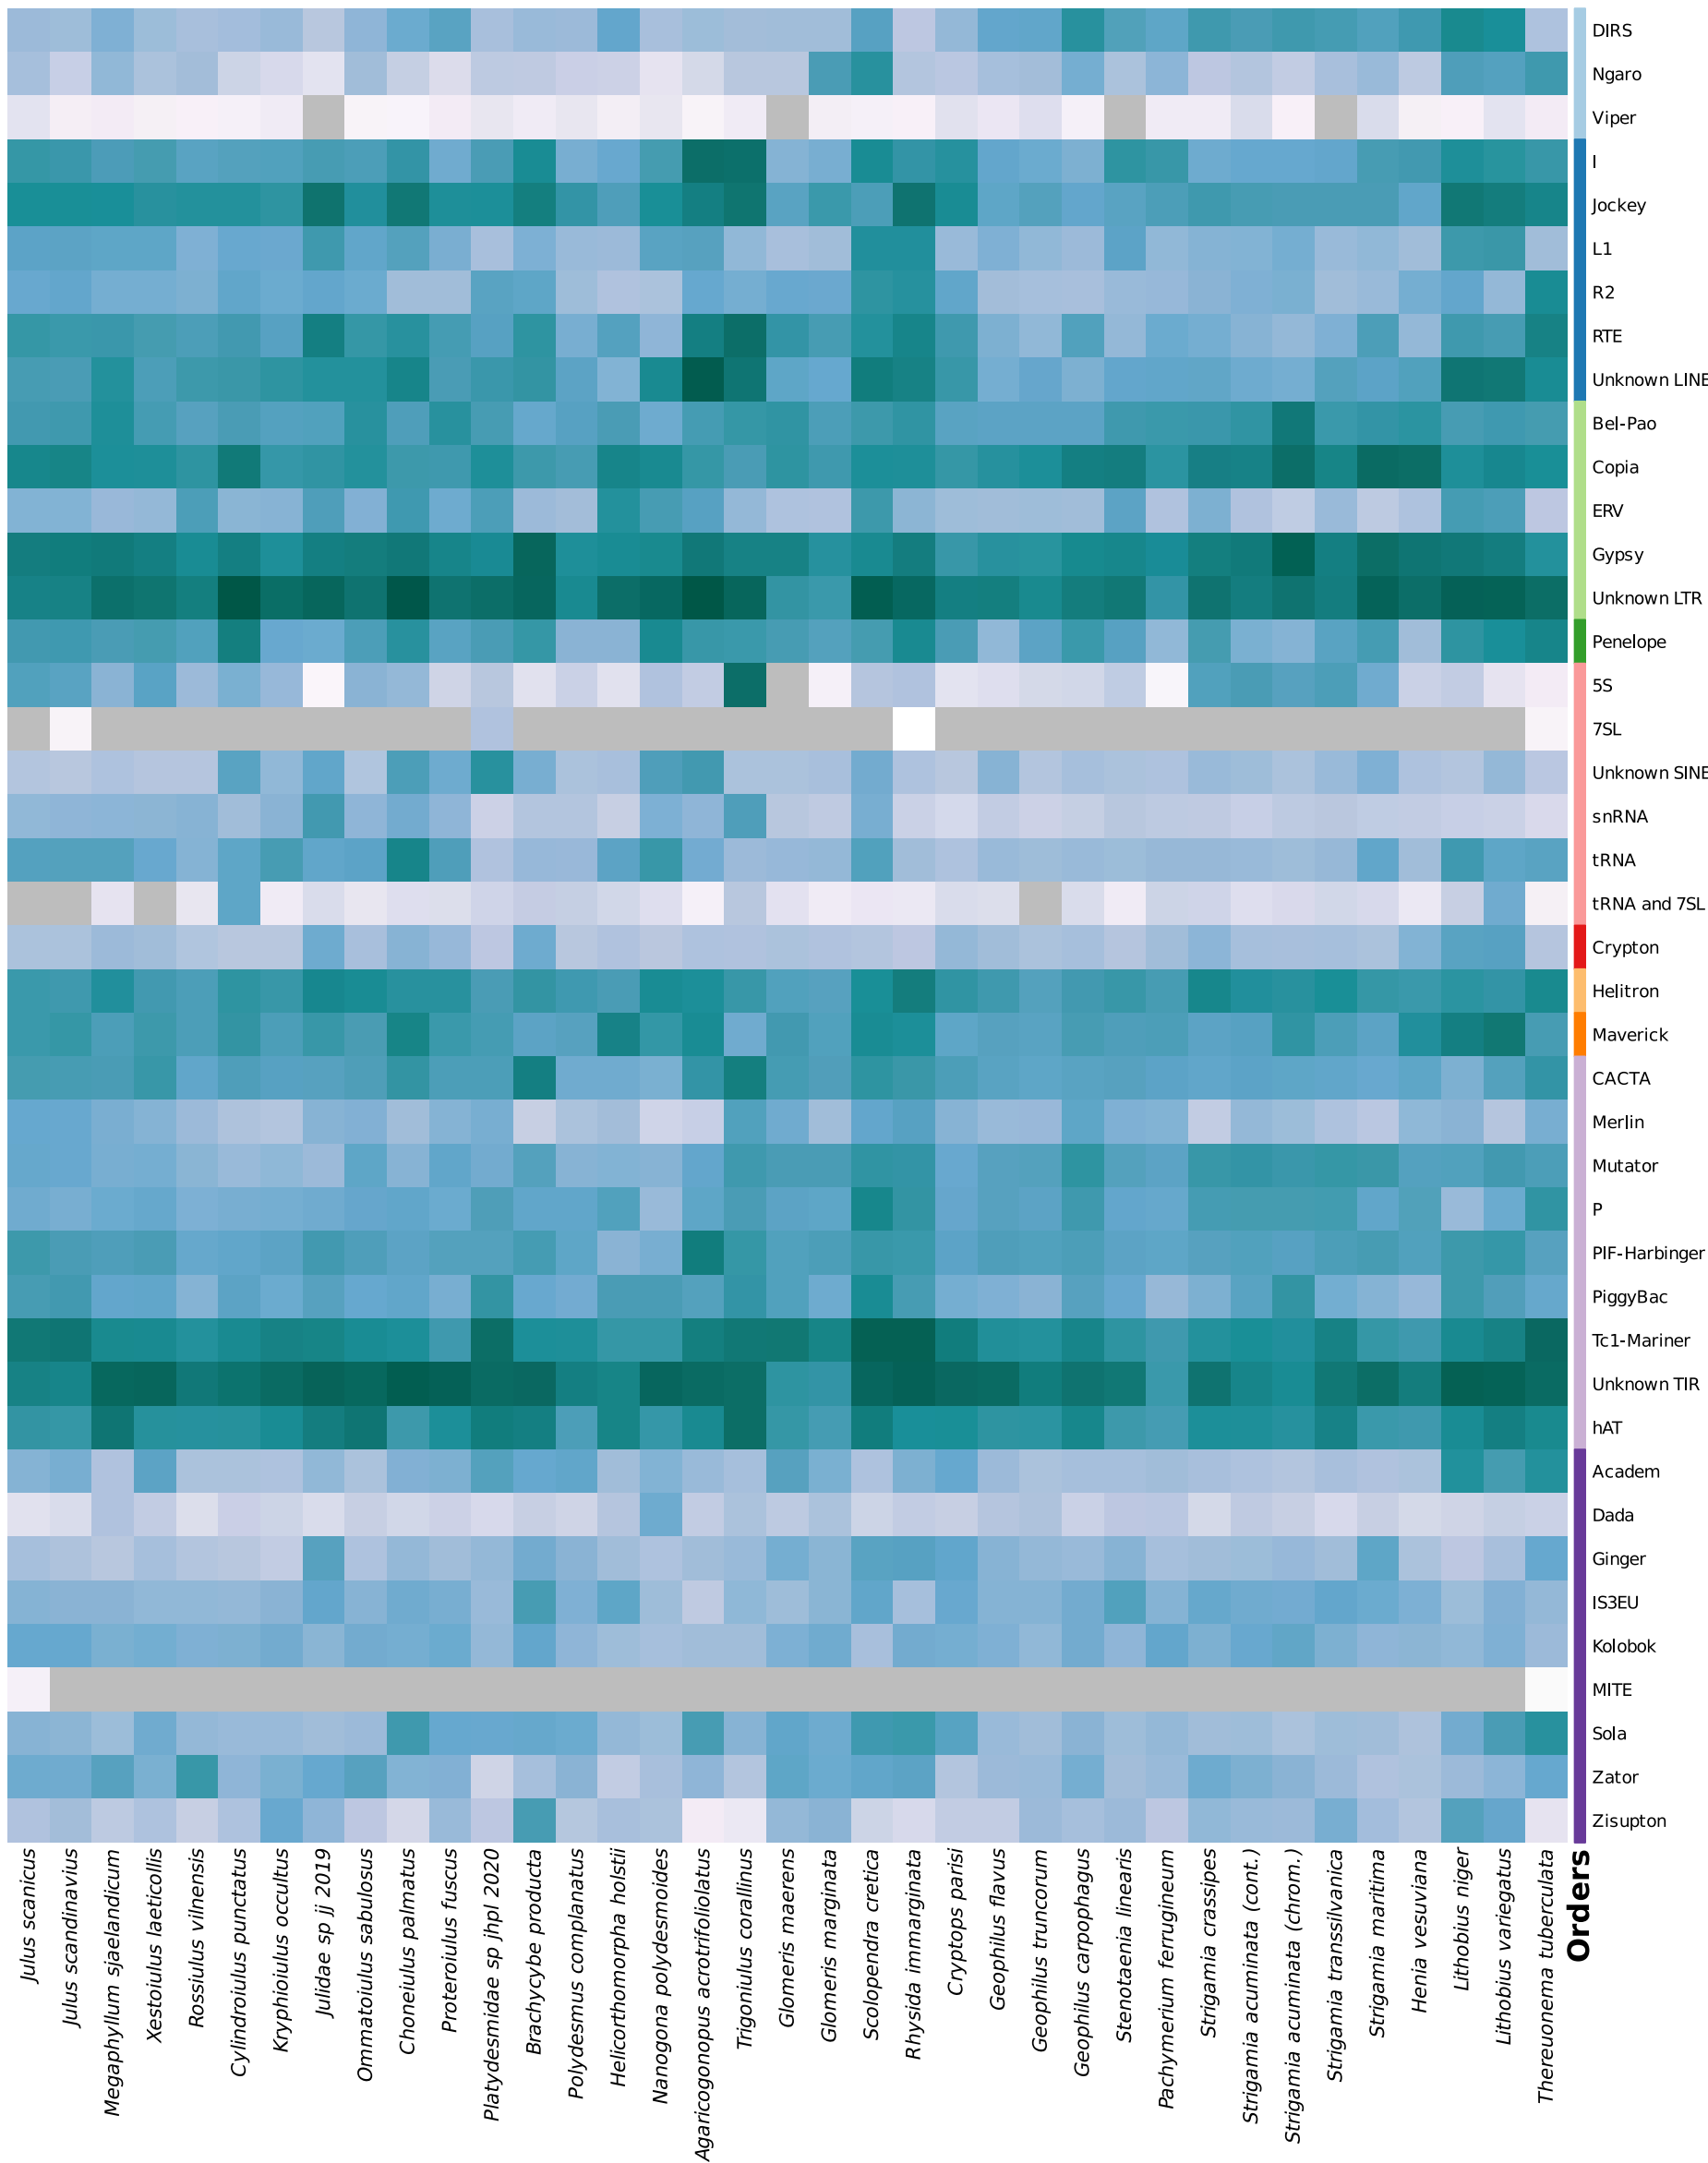

Orders

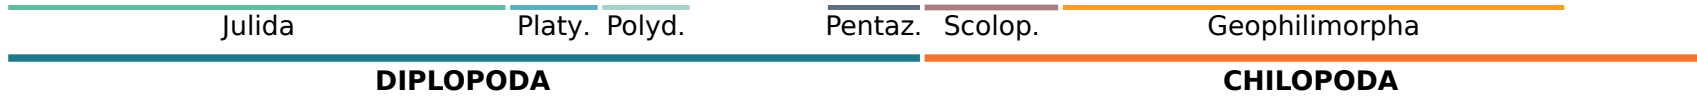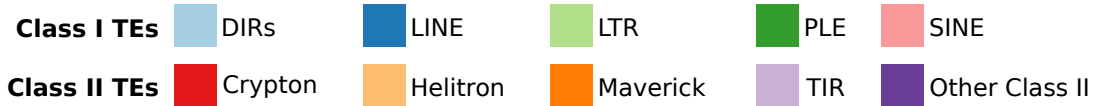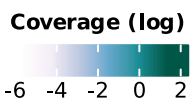

Supplement: Supplementary file 1 [file 0b0474301ef6a98d8d58cfff.pdf]

**A**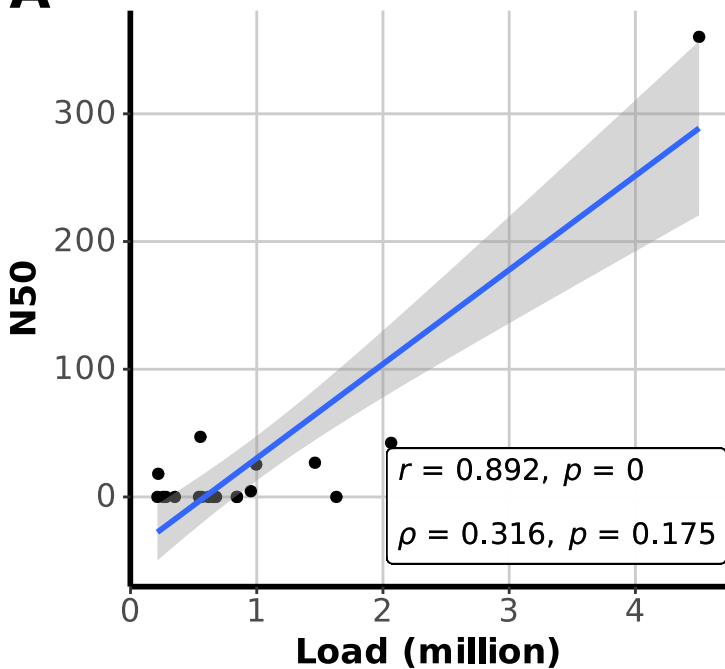**B**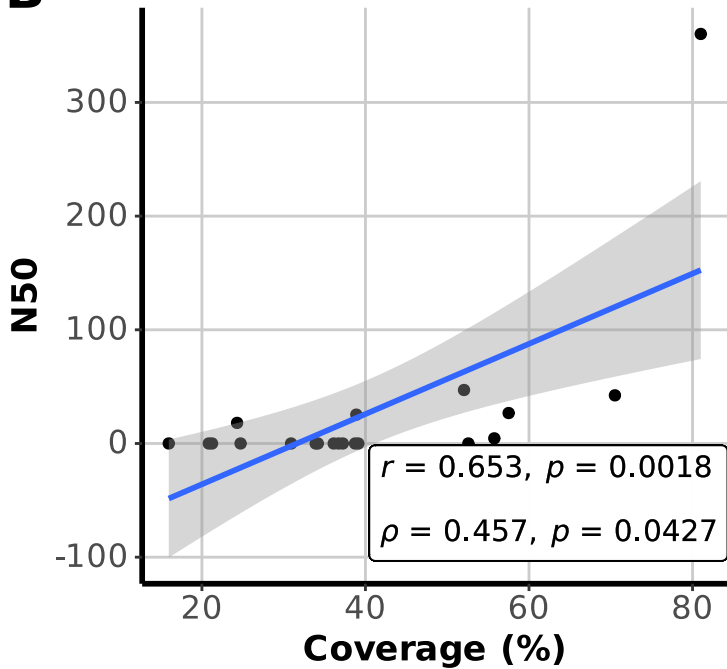**C**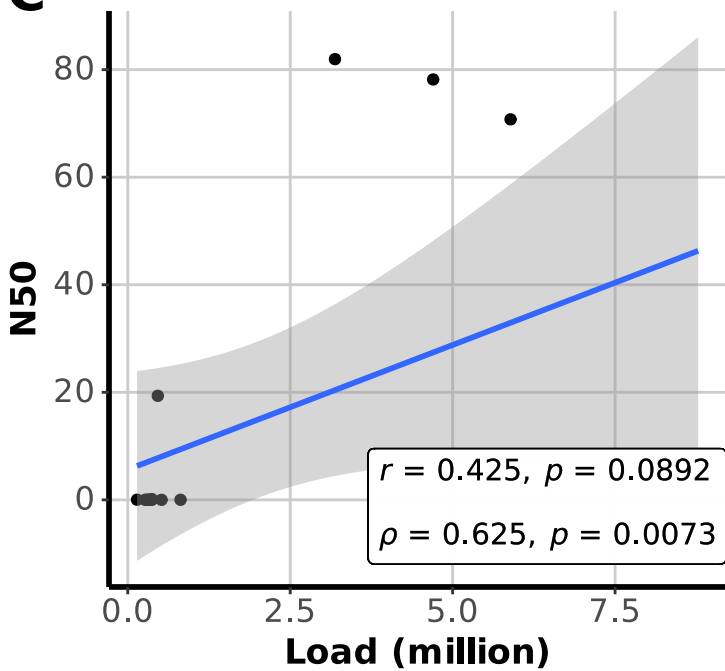**D**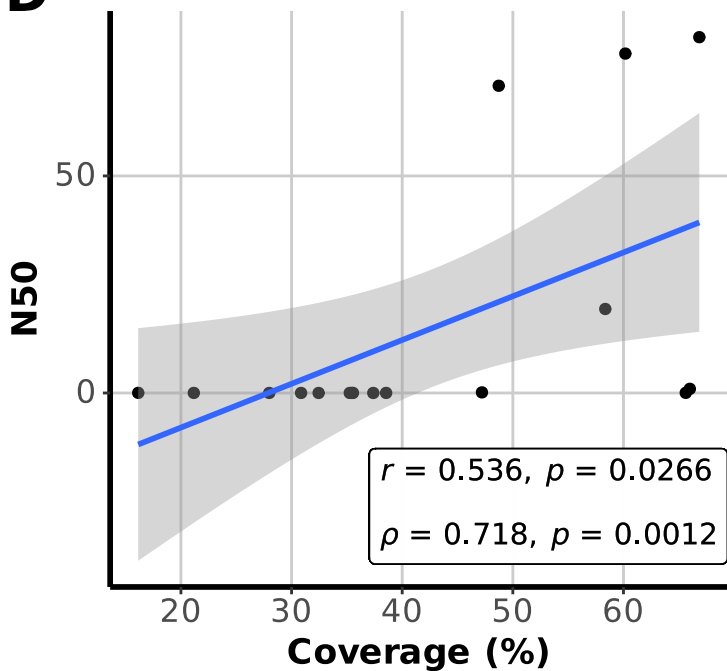

Supplement: Supplementary file 3 [file 6a3da922dc7485db8513d88a.pdf]
